# Supplementary material for: Intracellular infection-responsive macrophage-targeted nanoparticles for synergistic antibiotic immunotherapy of bacterial infection
Source: Royal Society of Chemistry journal article supplement (doi:10.1039/d4tb00409d), 2024-01-01
Supplement: d4tb00409d1.pdf [file d4tb00409d1.pdf]

## Supporting Information

### **Intracellular infection-responsive macrophage-targeted nanoparticles for synergistic antibiotic-immunotherapy of bacterial infection**

Xiaomei Dai\*, Yu Li, Xiaojun Liu, Yongjie Zhang, Feng Gao\*

Laboratory of Functionalized Molecular Solids, Ministry of Education, Anhui Province Key Laboratory of Biomedical Materials and Chemical Measurement, College of Chemistry and Materials Science, Anhui Normal University, Wuhu 241002, P. R. China.

Email: [daixiaomei@mail.ahnu.edu.cn](mailto:daixiaomei@mail.ahnu.edu.cn)

Email: [fgao@mail.ahnu.edu.cn](mailto:fgao@mail.ahnu.edu.cn)

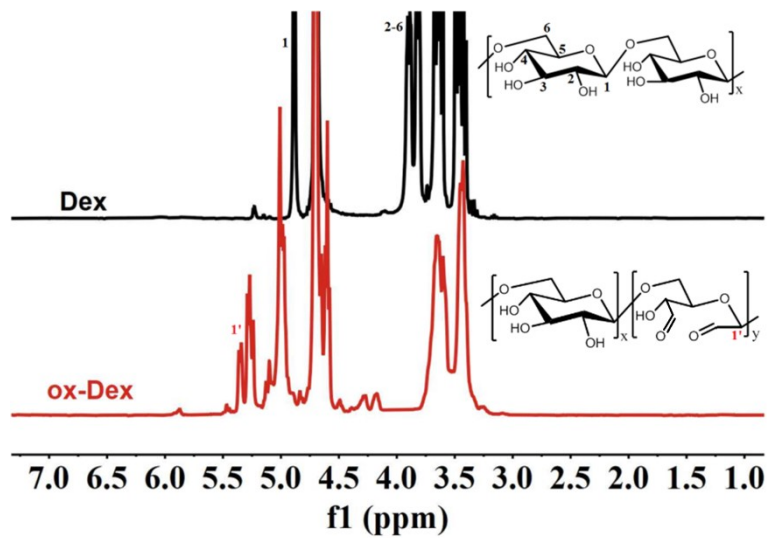

Fig. S1  $^1\text{H}$  NMR spectra of dextran and ox-Dex ( $\text{D}_2\text{O}$ , 400 MHz).

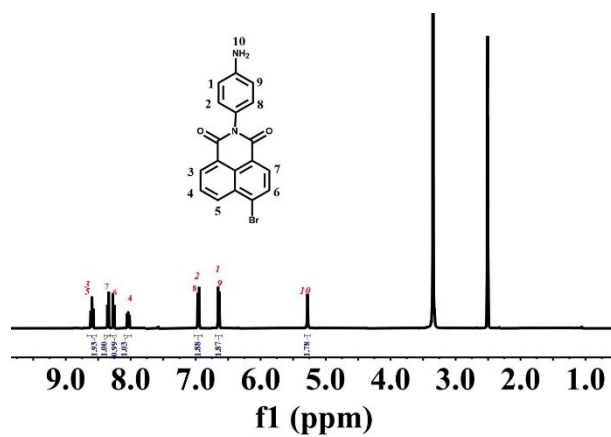

Fig. S2  $^1\text{H}$  NMR spectrum of compound 2 ( $\text{DMSO}-d_6$ , 400 MHz).

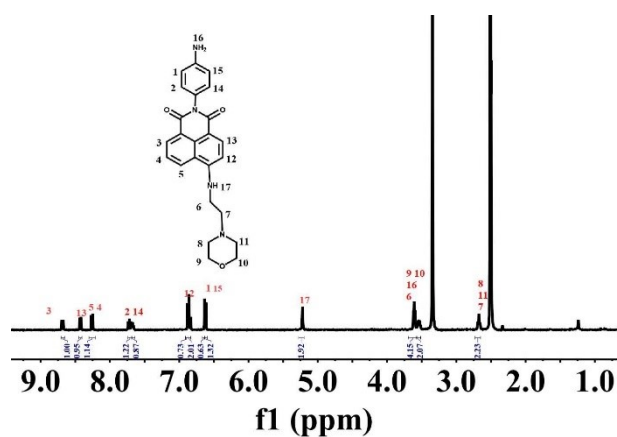

Fig. S3  $^1\text{H}$  NMR spectrum of  $\text{NA-NH}_2$  ( $\text{DMSO}-d_6$ , 400 MHz).

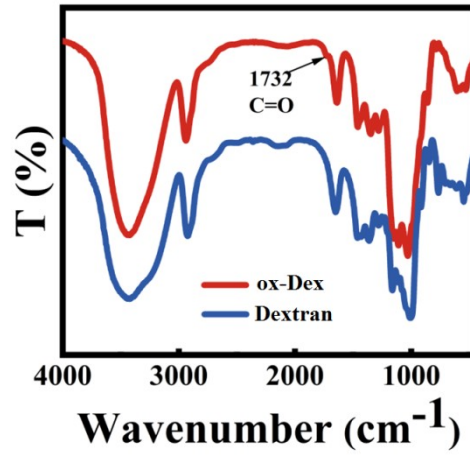

Fig. S4 FTIR spectra of ox-Dex and dextran.

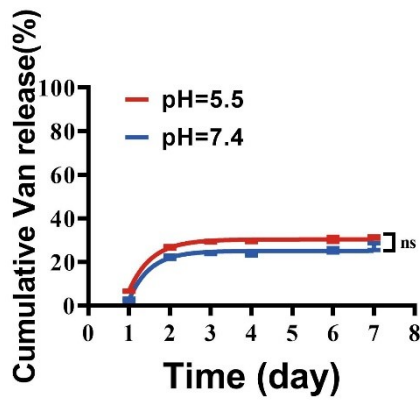

Fig. S5 Van release profiles detected from ox-Dex-Se/Van at pH 7.4 or pH 5.5.

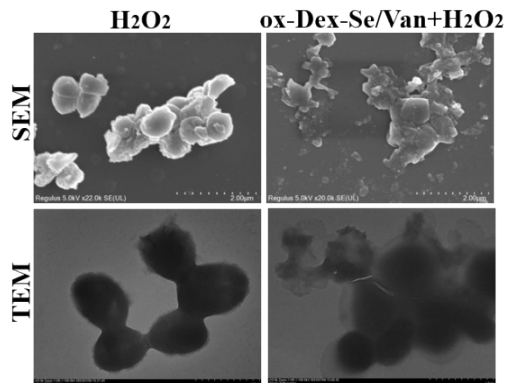

Fig. S6 SEM and TEM images of bacteria after being treated with 1 mM H<sub>2</sub>O<sub>2</sub> and ox-Dex-Se/Van+1 mM H<sub>2</sub>O<sub>2</sub>.

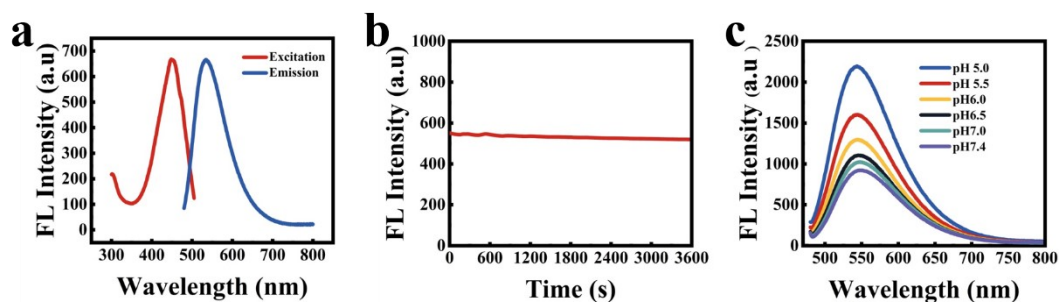

**Fig. S7** Fluorescence spectra of NA-NH<sub>2</sub> loaded ox-Dex-Se/Van nanoparticles (a). Fluorescence stability of NA-NH<sub>2</sub> loaded ox-Dex-Se/Van nanoparticles (b). Fluorescence spectra of NA-NH<sub>2</sub> loaded ox-Dex-Se/Van nanoparticles in PBS with various pH values (c).

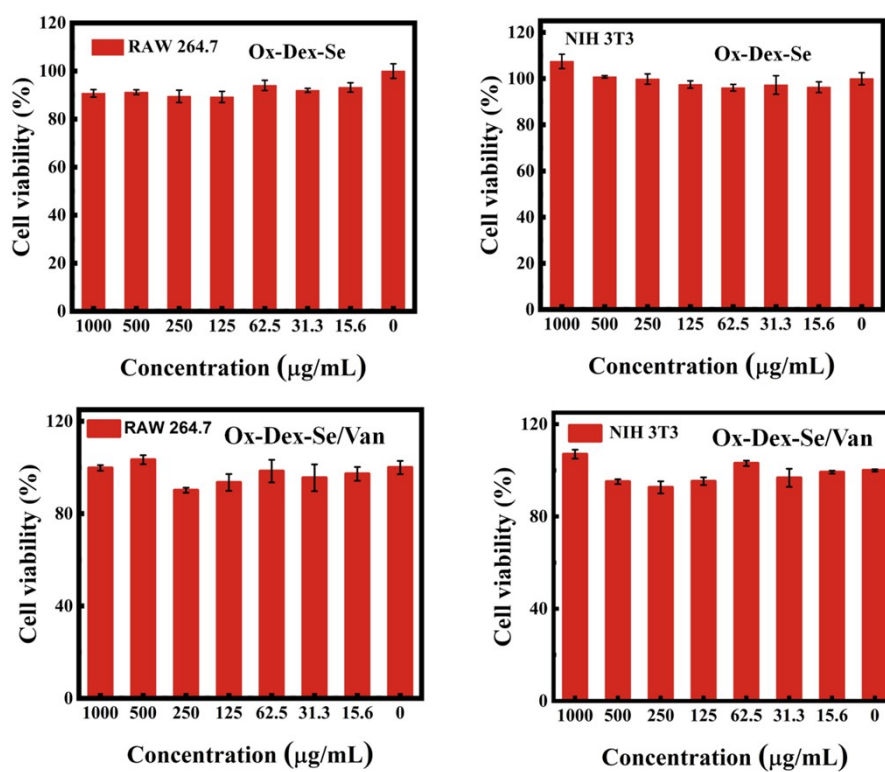

**Fig. S8** The viability of RAW 264.7 and NIH 3T3 cells after incubation of ox-Dex-Se or ox-Dex-Se/Van for 24 h.

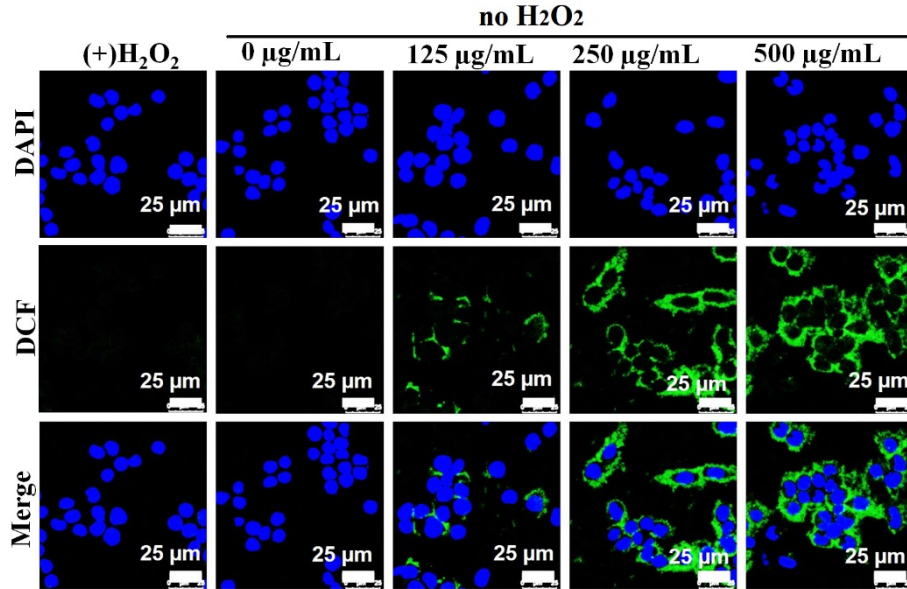

Fig. S9 Intracellular ROS detection by DCFH-DA staining.

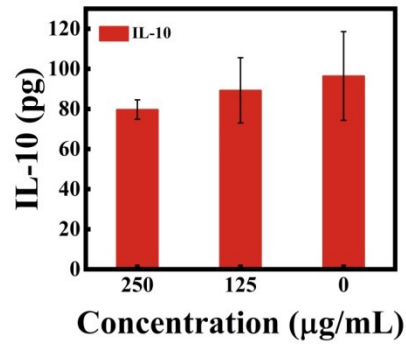

Fig. S10 IL-10 levels detected by ELISA.

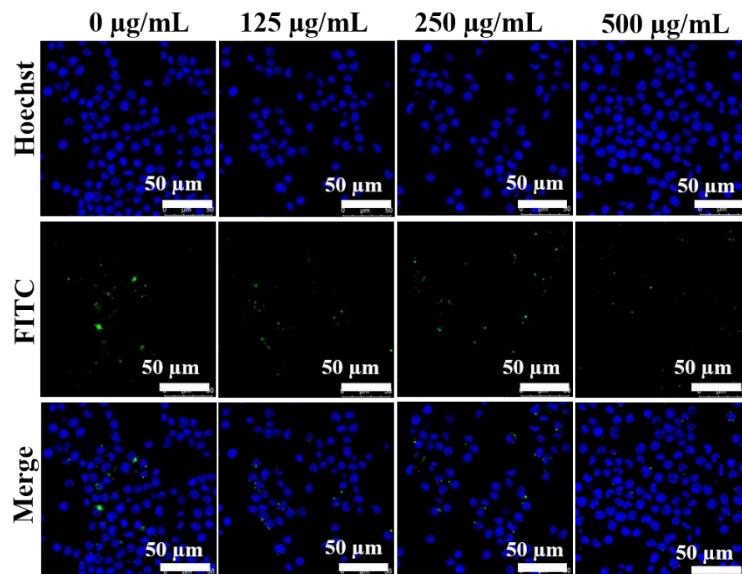

Fig. S11 CLSM images of bacteria-infected macrophages after being treated with Van.

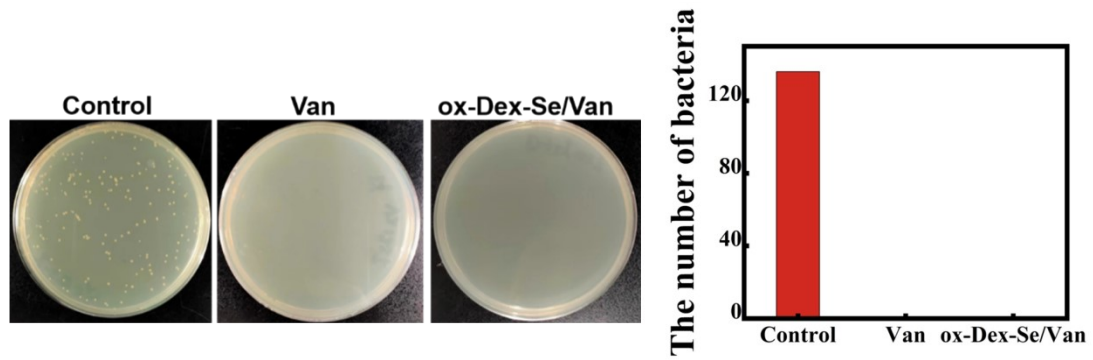

**Fig. S12** Bacterial colonies obtained from the wound tissues of different groups of rats at day 8.

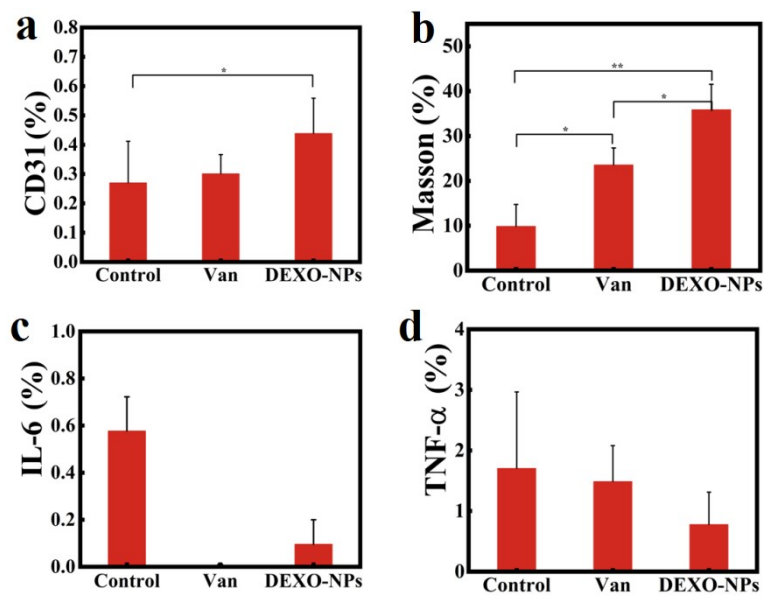

**Fig. S13** The quantitative histogram of CD31, Masson, IL-6, and TNF- $\alpha$ .

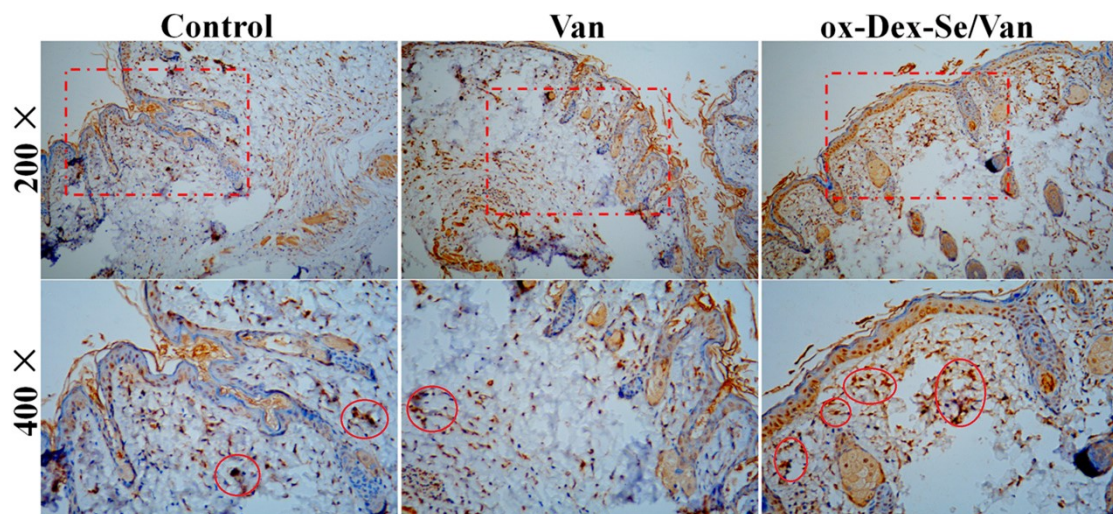

**Fig. S14** IL-10 immunohistochemical staining of skin wound on day 8.
